# Supplementary material for: Self-citation is the hallmark of productive authors, of any gender
Source: PubMed Central journal article supplement (PMC6157831; doi:10.1371/journal.pone.0195773), 2018-09-26

First [n=41,328]  
(Science)

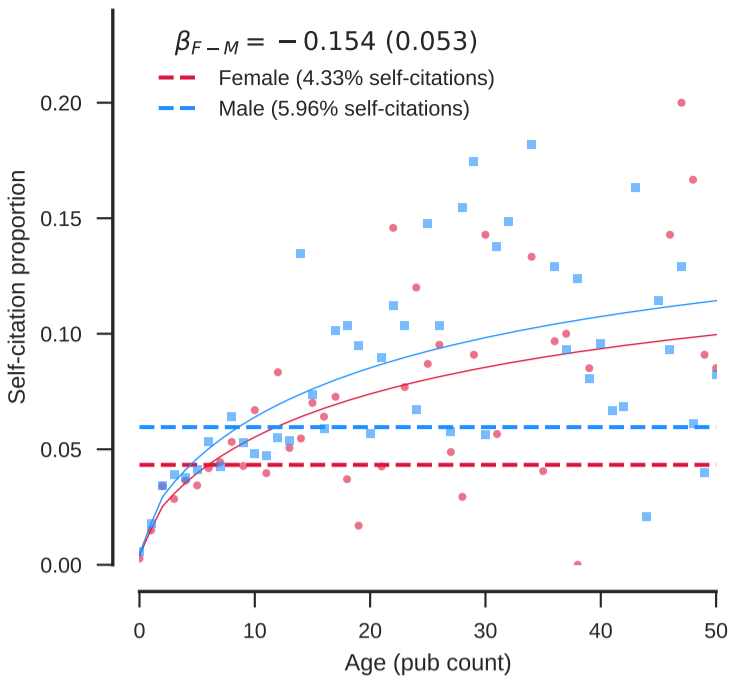

Last [n=45,043]  
(Science)

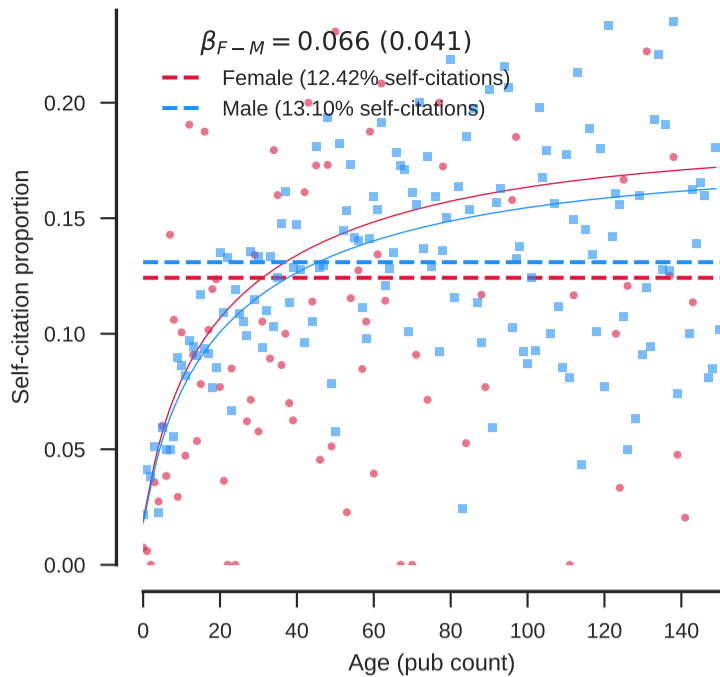

First [n=298,356]  
(Proc Natl Acad Sci U S A)

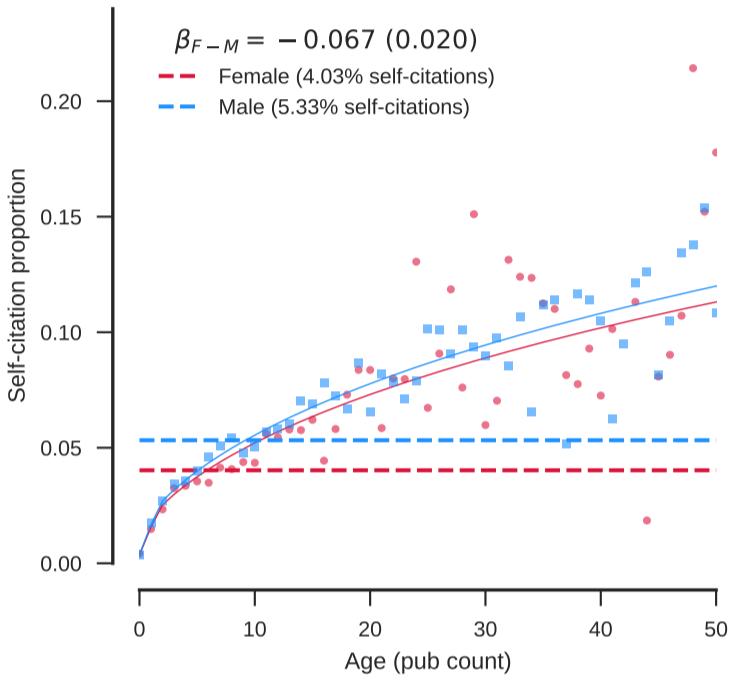

Last [n=334,968]  
(Proc Natl Acad Sci U S A)

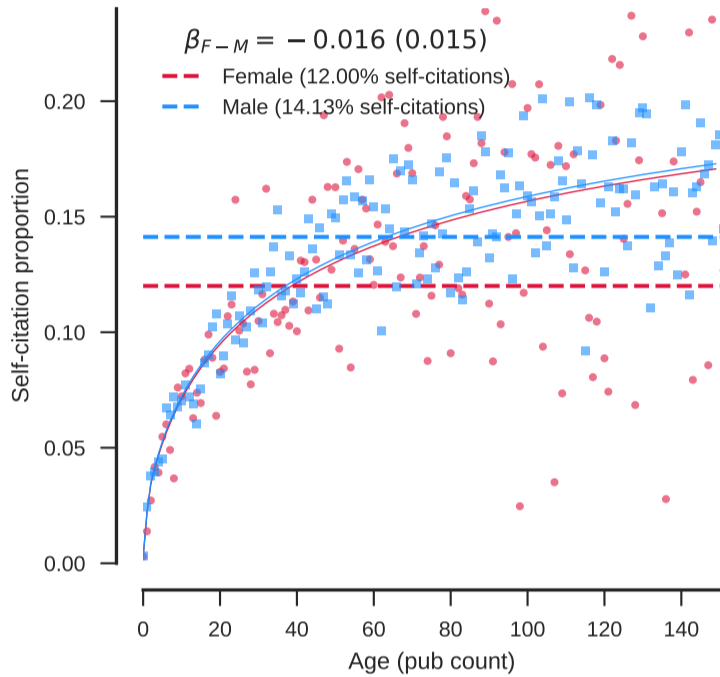

First [n=52,540]  
(Ann N Y Acad Sci)

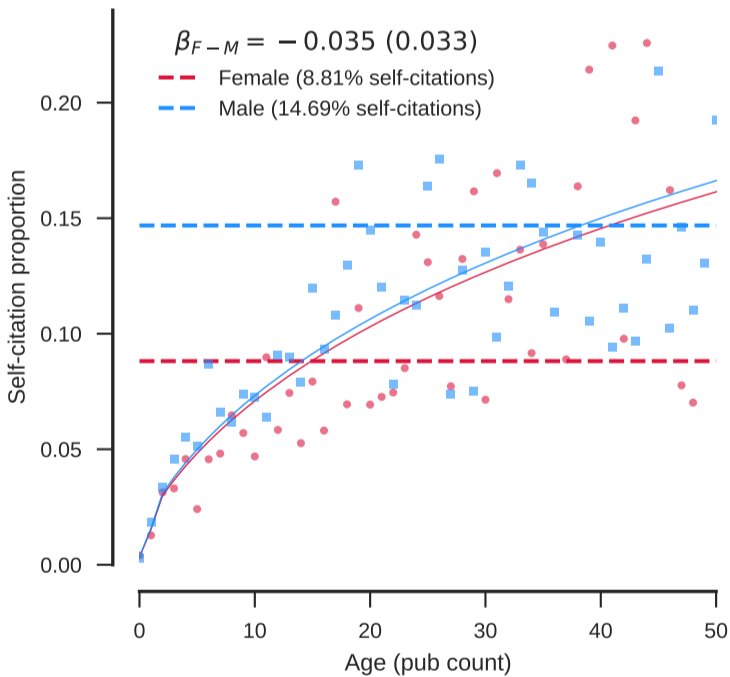

Last [n=54,224]  
(Ann N Y Acad Sci)

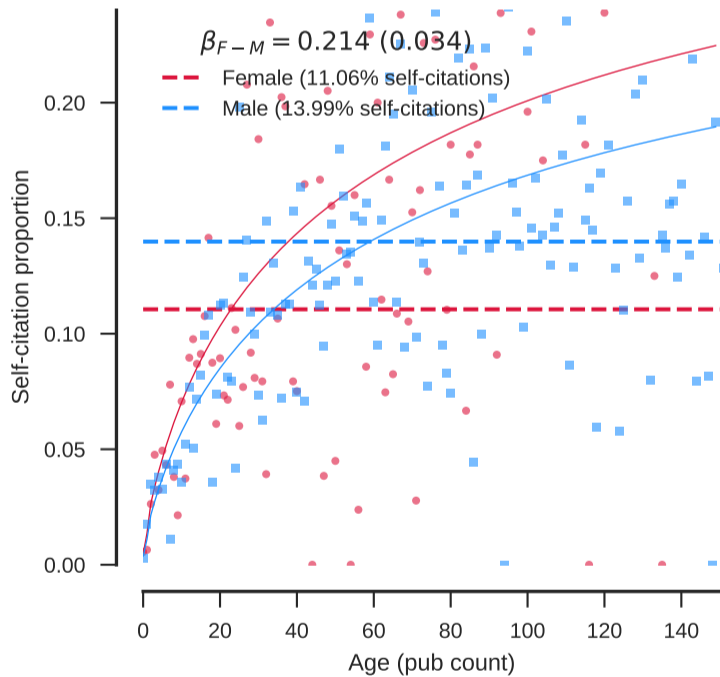

First [n=46,138]  
(Nature)

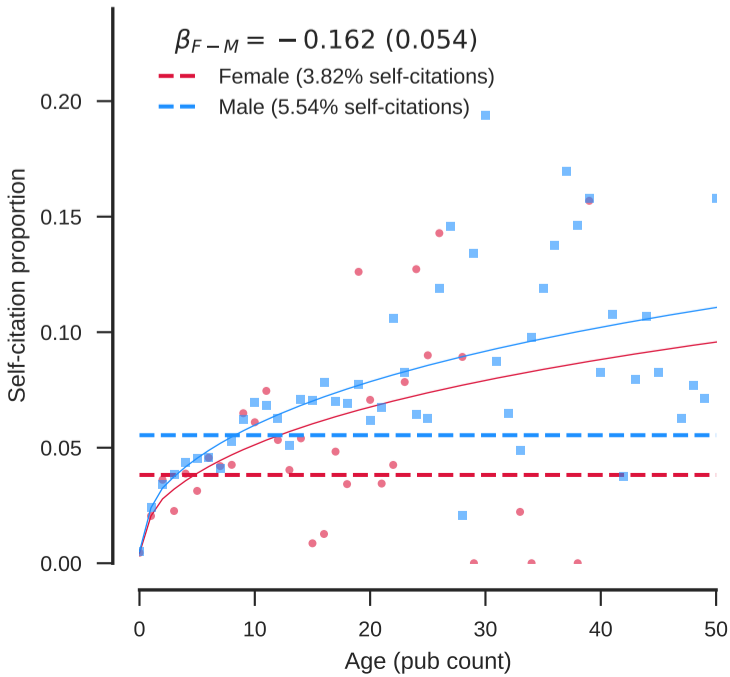

Last [n=50,625]  
(Nature)

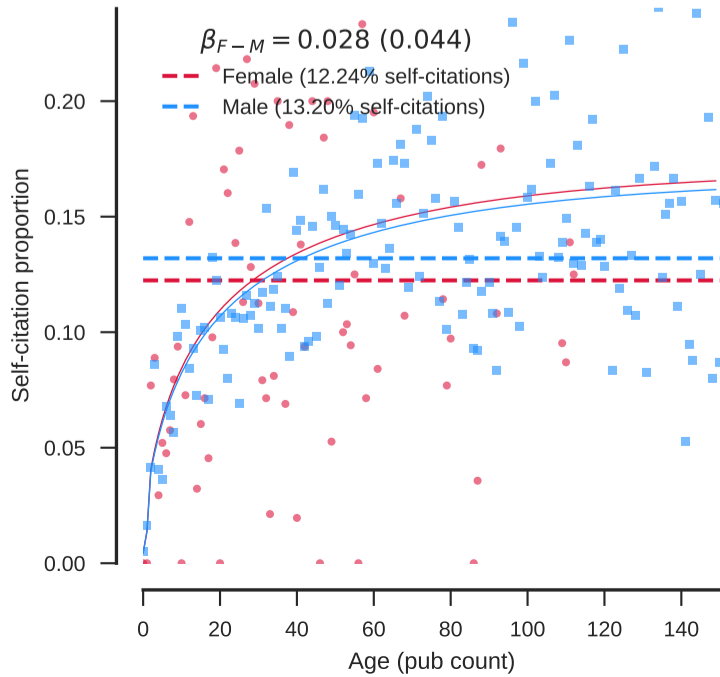

Supplement: pone.0195773.s002.pdf [file pone.0195773.s002.pdf]
