# Supplementary material for: Self-citation is the hallmark of productive authors, of any gender
Source: PubMed Central journal article supplement (PMC6157831; doi:10.1371/journal.pone.0195773), 2018-09-26
Supplement: pone.0195773.s005.pdf [file pone.0195773.s005.pdf]

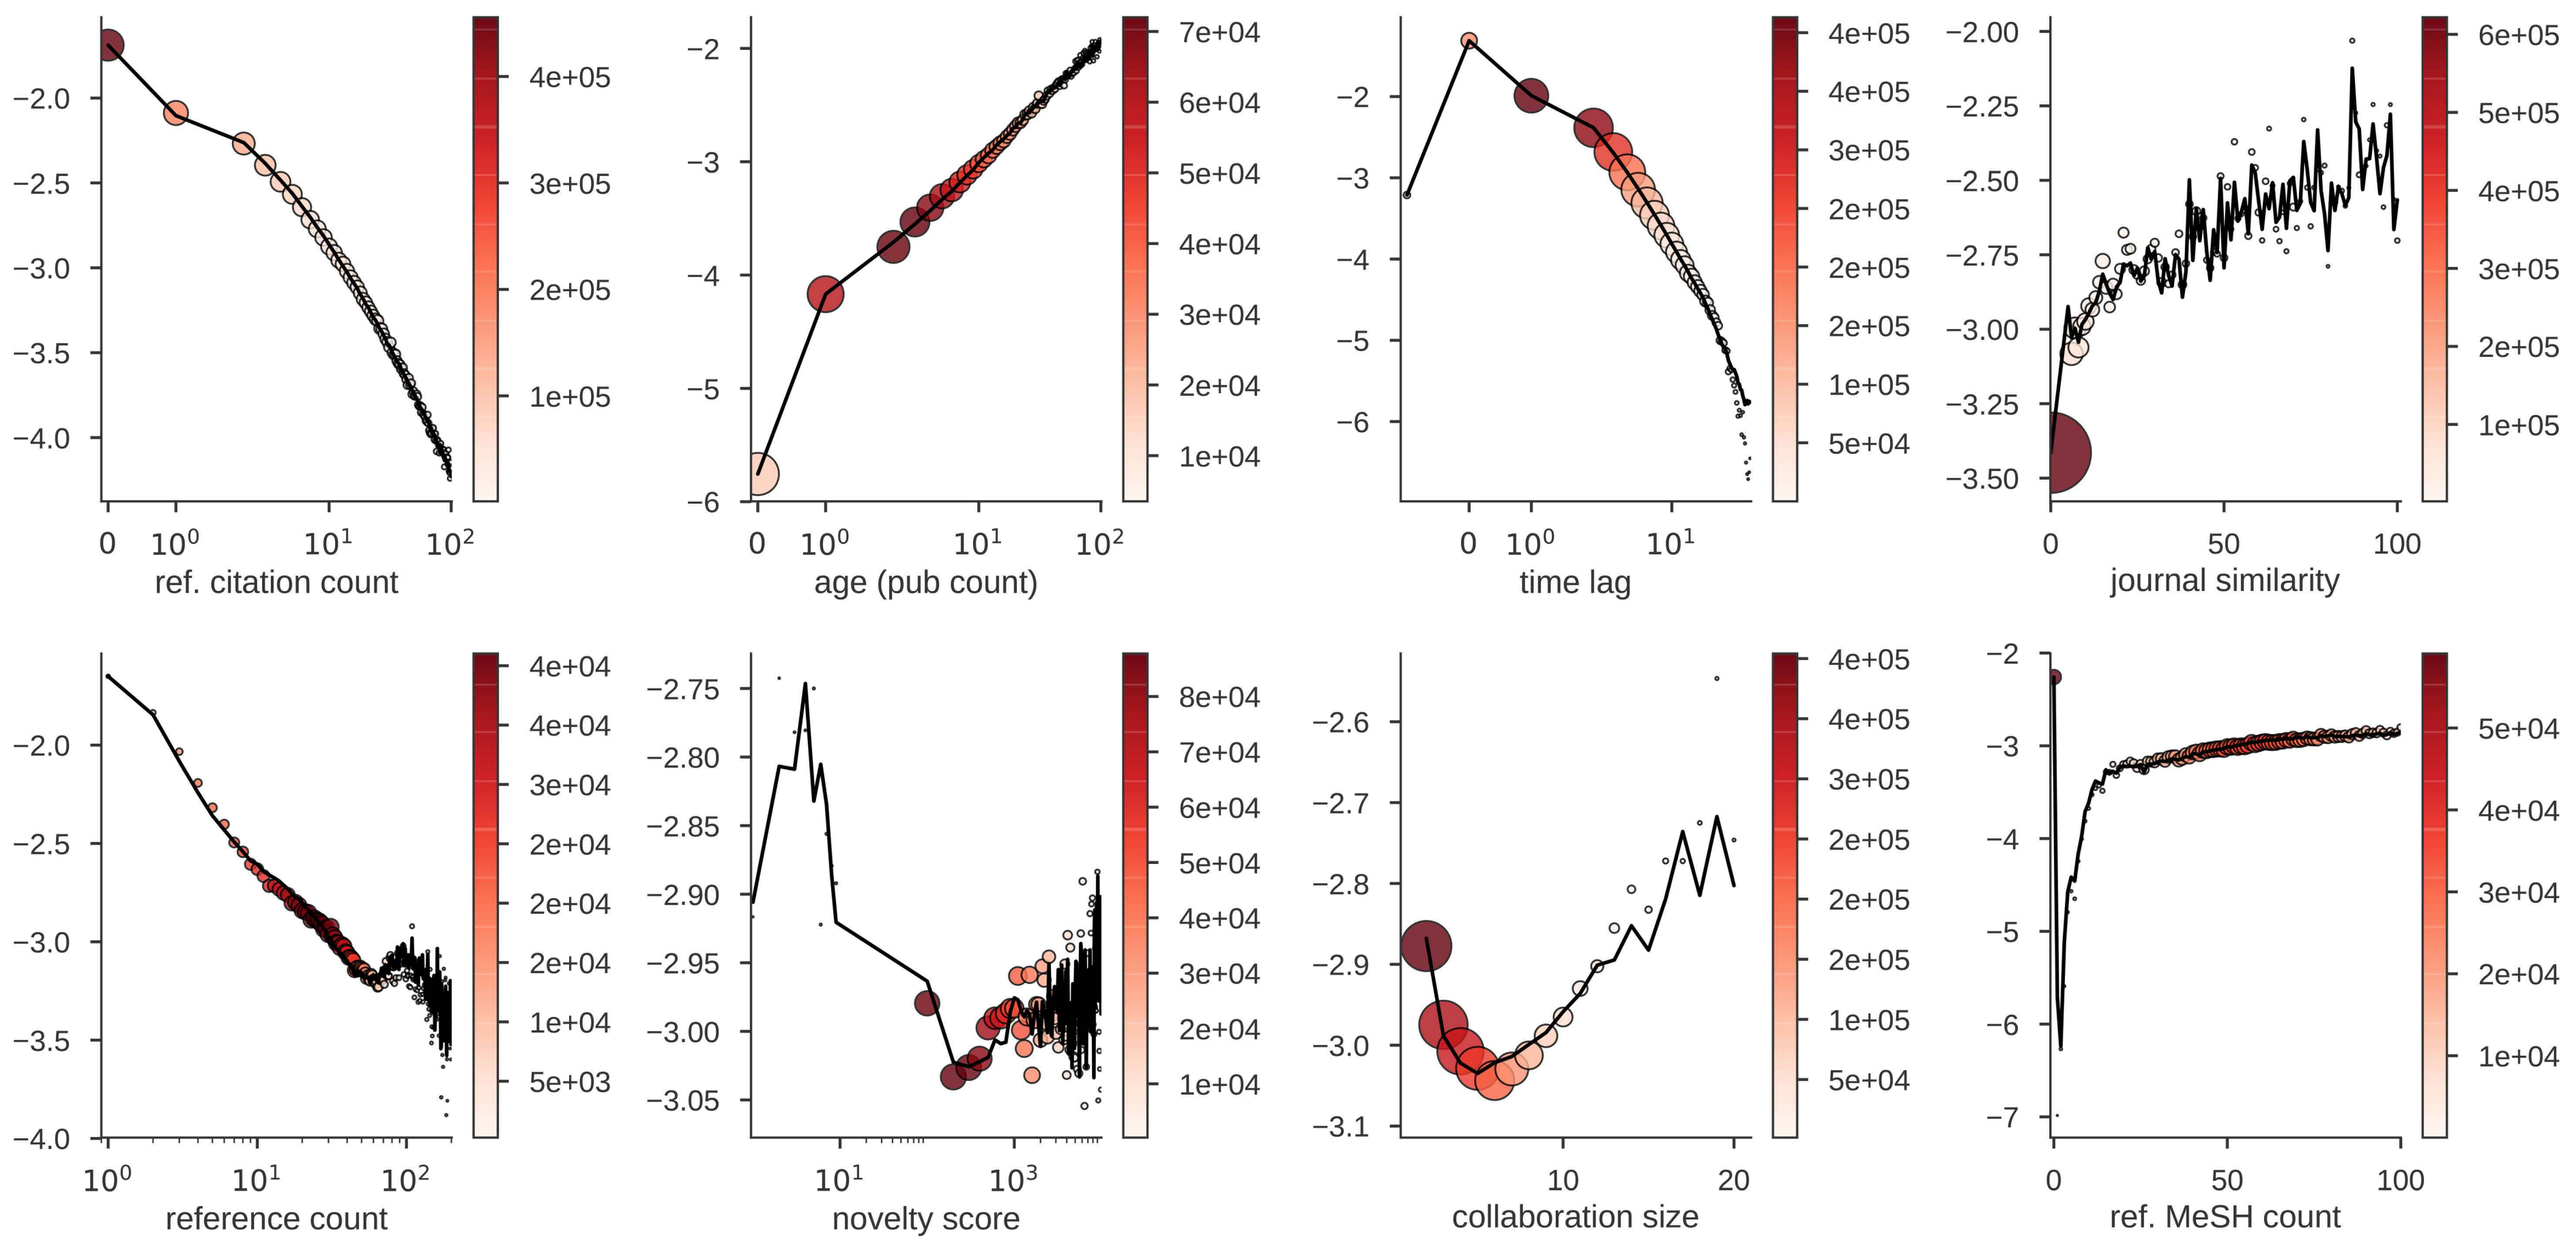

(a) First author

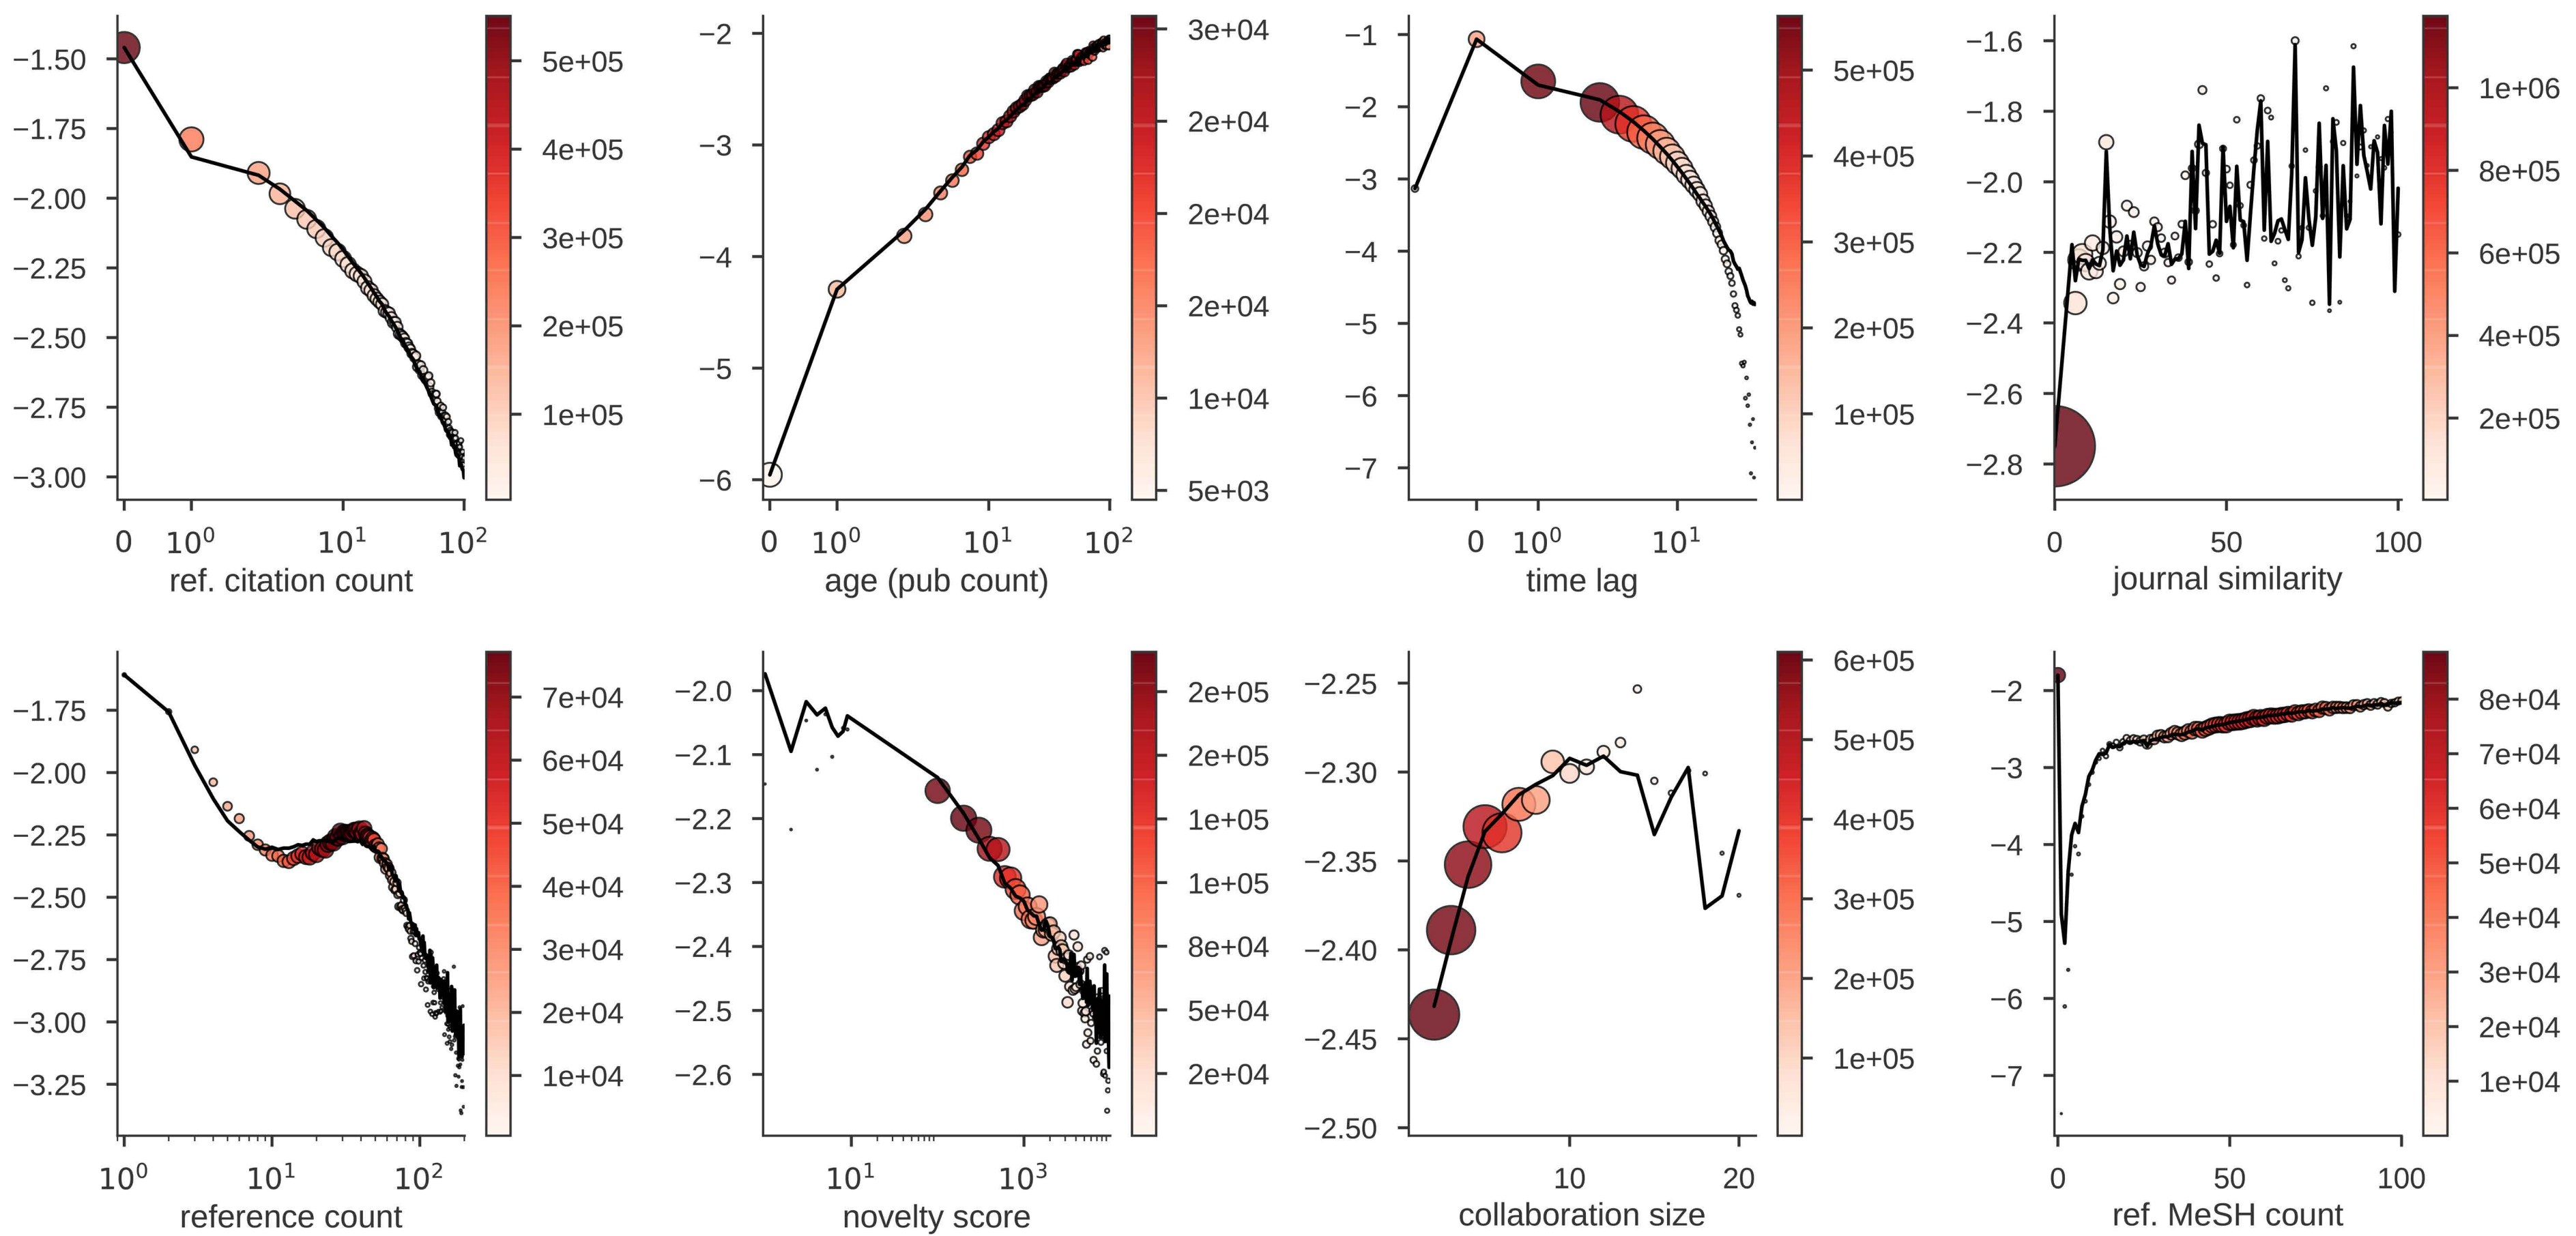

(b) Last author
